# Supplementary material for: Salt-induced erosion of hydrogen-bonded layer-by-layer assembled films
Source: Royal Society of Chemistry journal article supplement (doi:10.1039/b813614a), 2008-12-16
Supplement: b813614a.pdf [file b813614a.pdf]

Supplementary Information for manuscript titled "Salt-induced Erosion of Hydrogen-bonded Layer-by-layer Assembled Films" by Wang Lin, Ying Guan, Yongjun Zhang, Jian Xu, and X. X. Zhu.

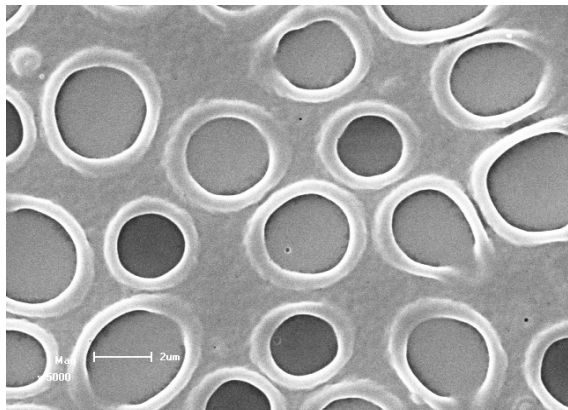

Fig. 1 SEM image of a (PVPON/PAA)<sub>12</sub> films after treated in 0.005M NaCl/DI water for 2 min. Clear rims around the edge of holes were observed.
